# Supplementary material for: Asymmetric anthracene hosts decorated with naphthobenzofurocarbazole for highly efficient deep-blue organic light-emitting diodes and low-efficiency roll-off
Source: Royal Society of Chemistry journal article supplement (doi:10.1039/d3tc01681a), 2023-01-01
Supplement: d3tc01681a1.pdf [file d3tc01681a1.pdf]

*Supporting information*

**Asymmetric anthracene hosts decorated with naphthobenzofurocarbazole  
for highly efficient deep blue organic light-emitting diodes and low  
efficiency roll-off**

Yeonju Jeong,<sup>‡a</sup> Kyo Min Hwang,<sup>‡a</sup> Jae Hee Lee,<sup>‡c</sup> Min Jeong Kwon,<sup>c</sup> Taekyung Kim<sup>\*ab</sup> and

Wan Pyo Hong<sup>\*c</sup>

<sup>a</sup>Department of Information Display, Hongik University, Seoul, 04066, Korea

<sup>b</sup>Department of Materials Science and Engineering, Hongik University, Sejong, 30016, Korea

<sup>c</sup>Department of Chemistry, Gachon University 1342, Seongnam-daero, Sujeong-gu, Seongnam-si,  
Gyeonggi-do, Korea

|                                                                                                                                                                                            | Page |
|--------------------------------------------------------------------------------------------------------------------------------------------------------------------------------------------|------|
| <b>I. Supplementary Schemes, Figures and Tables</b> .....                                                                                                                                  |      |
| <b>Scheme S1.</b> Synthetic route for NBFC .....                                                                                                                                           | S3   |
| <b>Scheme S2.</b> Synthesis of 5-(4-(10-phenylanthracen-9-yl)phenyl)-5 <i>H</i> -<br>naphtho[2',3':4,5]furo[3,2- <i>c</i> ]carbazole (ATPNF-1).....                                        | S5   |
| <b>Scheme S3.</b> Synthesis 5-(3-(10-phenylanthracen-9-yl)phenyl)-5 <i>H</i> -<br>naphtho[2',3':4,5]furo[3,2- <i>c</i> ]carbazole (ATPNF-2).....                                           | S6   |
| <b>Figure S1.</b> The natural transition orbitals of the first five singlet and triplet states of<br>ATPNF-1 .....                                                                         | S7   |
| <b>Figure S2.</b> The natural transition orbitals of the first five singlet and triplet states of<br>ATPNF-2 .....                                                                         | S7   |
| <b>Figure S3.</b> The proportions of LE and CT of ATPNF-1 and ATPNF-2 .....                                                                                                                | S8   |
| <b>Figure S4.</b> Isosurface of the hole (blue) and electron (green) distribution calculated..                                                                                             | S8   |
| <b>Figure S5.</b> TGA and DSC of ATPNF-1 and ATPNF-2.....                                                                                                                                  | S9   |
| <b>Figure S6.</b> The cyclic voltammograms of ATPNF-1 and ATPNF-2.....                                                                                                                     | S9   |
| <b>Figure S7.</b> Molecular structures.....                                                                                                                                                | S10  |
| <b>Figure S8.</b> <i>J-V</i> characteristic of a) electron only device (EOD) b) hole only device (HOD)<br>and of ATPNF-1-ND and ATPNF-2-ND. ....                                           | S10  |
| <b>Figure S9.</b> CE-luminance-PE curves of ATPNF-1-ND and ATPNF-2-ND.....                                                                                                                 | S11  |
| <b>Figure S10.</b> Mobility of ATPNF-1-ND and ATPNF-2-ND calculated from SCLC region in<br>a) EOD and b) HOD, respectively .....                                                           | S11  |
| <b>Figure S11.</b> Photophysical dynamics of the ATPNF-1-ND and ATPNF-2-ND .....                                                                                                           | S12  |
| <b>Figure S12.</b> Device structure and energy diagram of t-DABNA doped ATPNF-1 and<br>ATPNF-2 device (ATPNF-1-D and ATPNF-2-D) .....                                                      | S12  |
| <b>Figure S13.</b> J-V characteristic of a) EOD and b) HOD of ATPNF-1-D and ATPNF-2-D<br>.....                                                                                             | S13  |
| <b>Figure S14.</b> Photoluminescence curve of doped ATPNF-1 and ATPNF-2 film excited at<br>375 nm, and UV-vis of doped ATPNF-1 and ATPNF-2 film and t-DABNA solution (in<br>toluene) ..... | S13  |
| <b>Figure S15.</b> a) TrEL response at 6.6 V and b) DF portion of ATPNF-1-D and ATPNF-2-D<br>.....                                                                                         | S14  |
| <b>Table S1.</b> Calculated electronic excitation energies, oscillator strengths and MO transition<br>contributions for ATPNF-1 and ATPNF-2.....                                           | S14  |
| <b>Table S2.</b> Photophysical properties of ATPNF-1 and ATPNF-2 in different solvents.....                                                                                                | S15  |
| <b>Table S3.</b> The subdivided proportions that contribute to radiative singlet exciton efficiency<br>of ATPNF-1-ND and ATPNF-2-ND.....                                                   | S15  |
| <b>Table S4.</b> The EL properties of ATPNF-1-D and ATPNF-2-D.....                                                                                                                         | S15  |
| <b>Table S5.</b> The EL properties of ATPNF-1-D and ATPNF-2-D.....                                                                                                                         | S16  |
| <b>Equation S1</b> .....                                                                                                                                                                   | S16  |
| <b>II. Measurements</b> .....                                                                                                                                                              | S17  |
| <b>III. <sup>1</sup>H NMR of ATPNF-1 and ATPNF-2 in CDCl<sub>3</sub></b> .....                                                                                                             | S19  |
| <b>IV. <sup>13</sup>C NMR of ATPNF-1 and ATPNF-2 in CDCl<sub>3</sub></b> .....                                                                                                             | S20  |
| <b>V. HR-MS of ATPNF-1 and ATPNF-2</b> .....                                                                                                                                               | S21  |
| <b>VI. HPLC of ATPNF-1 and ATPNF-2</b> .....                                                                                                                                               | S23  |

## I. Supplementary Figures, Scheme and Tables

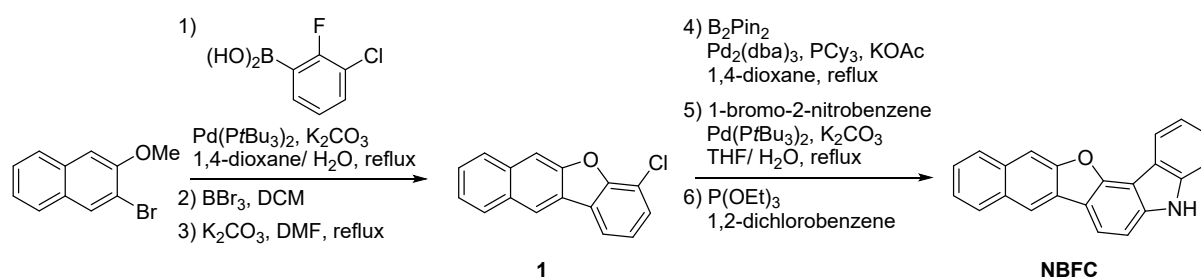

**Scheme S1.** Synthetic route of NBFC

### *Synthesis of 4-chloronaphtho[2,3-*b*]benzofuran 1:*

2-bromo-3-methoxynaphthalene (11.85 g, 50 mmol) and 3-chloro-2-fluorophenylboronic acid (9.59 g, 55 mmol) were dissolved in 300 ml of 1,4-dioxane: water (2:1) mixture containing potassium carbonate ( $\text{K}_2\text{CO}_3$ ) (3.0 eq.) and 1.0 mol% of bis(tri-*tert*-butylphosphine)palladium(0) [ $\text{Pd}(\text{P}t\text{Bu}_3)_2$ ] as a catalyst. Under a nitrogen atmosphere, the reaction mixture was refluxed for 12 h. After cooling, the reaction mixture was extracted with ethyl acetate (200 ml) and washed with water. The organic layer was dried over anhydrous sodium sulfate ( $\text{Na}_2\text{SO}_4$ ) and filtered through a short silica plug. The desired fractions were evaporated under reduced pressure and dried.

The corresponding product was dissolved in 400 ml of dichloromethane (DCM) and cooled to  $-10\text{ }^\circ\text{C}$  under nitrogen atmosphere. Boron tribromide ( $\text{BBr}_3$ ) (1.2 eq.) was slowly added and the reaction mixture was stirred at room temperature for 24 h. The mixture was slowly quenched with saturated sodium bicarbonate ( $\text{NaHCO}_3$ ) solution and extracted with DCM. The organic layer was dried over anhydrous  $\text{Na}_2\text{SO}_4$  and filtered through a short silica plug. The solvent was evaporated under reduced pressure and dried.

The corresponding product and  $\text{K}_2\text{CO}_3$  (1.5 eq.) were dissolved in 100 ml of *N,N*-dimethylformamide. The mixture was stirred at  $160\text{ }^\circ\text{C}$  under a nitrogen condition for 8 h. After cooling to room temperature, the mixture was extracted with diethyl ether and rinsed with water. The organic layer was dried over anhydrous  $\text{Na}_2\text{SO}_4$  and filtered through a short silica plug. The solvent was evaporated under reduced pressure and dried to afford 4-chloronaphtho[2,3-*b*]benzofuran **1** (4.6 g, 18.2 mmol) which was further crystallized from

diethyl ether-pentane (3.8 g, 15.0 mmol).  $^1\text{H}$  NMR (500 MHz,  $\text{CDCl}_3$ )  $\delta$  8.39 (s, 1H), 8.03 (dd,  $J = 8.1, 0.6$  Hz, 1H), 8.01 – 7.97 (m, 2H), 7.95 (dd,  $J = 7.6, 1.1$  Hz, 1H), 7.58 – 7.48 (m, 3H), 7.31 (t,  $J = 7.8$  Hz, 1H).  $^{13}\text{C}$  NMR (125 MHz,  $\text{CDCl}_3$ )  $\delta$  154.55, 153.34, 133.25, 130.29, 128.38, 128.32, 127.91, 126.16, 125.73, 124.99, 124.65, 123.61, 119.71, 119.54, 117.02, 107.53.

*Synthesis of 5H-naphtho[2',3':4,5]furo[3,2-c]carbazole (NBFC):*

*tris*(dibenzylideneacetone)dipalladium (1.83 g, 2.0 mmol) and tricyclohexyl phosphine (1.12g, 4.0 mmol) dissolved in 80 ml of 1,4-dioxane. The mixture was stirred at room temperature under a nitrogen condition for 10 min. 4-chloronaphtho[2,3-*b*]benzofuran (5.05 g, 20 mmol), 4,4,4',4',5,5,5',5'-Octamethyl-2,2'-bi-1,3,2-dioxaborolane ( $\text{B}_2\text{Pin}_2$ ) (10.15 g, 40 mmol) and potassium acetate (KOAc) (3.84 g, 40 mmol) were added and the reaction was refluxed under nitrogen atmosphere. After 24 h, the reaction mixture was cooled and evaporated under reduced pressure. Then the reaction mixture was diluted with dichloromethane and filtered through a short silica plug. The solvent was evaporated under reduced pressure, and the product was dried to afford 4,4,5,5-tetramethyl-2-(naphtho[2,3-*b*]benzofuran-4-yl)-1,3,2-dioxaborolane, which was crystallized from diethyl ether-pentane.

The corresponding product (6.88 g, 20 mmol) and 1-bromo-2-nitrobenzene (4.44 g, 22 mmol) were dissolved in 80 ml of 1,4-dioxane: water (2:1) mixture containing  $\text{K}_2\text{CO}_3$  (4.0 eq.) and 1.0 mol% of  $(\text{PdP}^t\text{Bu}_3)_2$  as a catalyst. Under a nitrogen atmosphere, the reaction mixture was stirred at reflux for 15 h. After cooling, the reaction mixture was extracted with ethyl acetate and rinsed with deionized water. The organic layer was dried over anhydrous  $\text{Na}_2\text{SO}_4$ , and filtered through a short silica plug. The solvent was evaporated under reduced pressure and the desired product was further purified by column chromatography yield 4-(2-nitrophenyl)naphtho[2,3-*b*]benzofuran (5.23 g, 15.4 mmol).

Triethyl phosphite [ $\text{P}(\text{OEt})_3$ ] (10.6 ml, 61.6 mmol) was added to a solution of 4-(2-nitrophenyl)naphtho[2,3-*b*]benzofuran (5.23 g, 15.4 mmol) in 1,2-dichlorobenzene (10 ml). The reaction mixture was stirred for 12 hours at 160 °C under a nitrogen atmosphere. The reaction mixture was concentrated to a brown paste by vacuum distillation to afford 5H-naphtho[2',3':4,5]furo[3,2-*c*]carbazole (NBFC), which was crystallized from DCM-pentane (2.68 g, 8.72 mmol).  $^1\text{H}$  NMR (500 MHz,  $\text{THF}-d_8$ )  $\delta$  10.80 (brs, 1H), 8.46 – 8.41 (m, 2H), 8.10 (d, 1H,  $J = 8.5$  Hz), 8.09 (m, 1H), 8.04 – 8.00 (m, 2H), 7.52 (dt,  $J = 8.1, 0.8$  Hz, 1H), 7.49 – 7.41 (m, 4H), 7.30 (ddd,  $J = 8.0, 7.2, 1.0$  Hz, 1H).  $^{13}\text{C}$  NMR (125 MHz,  $\text{THF}-d_8$ )  $\delta$  156.22,

153.79, 142.70, 140.89, 133.10, 131.80, 128.73, 128.64, 127.50, 126.30, 125.66, 124.94, 123.03, 121.71, 120.39, 119.02, 117.99, 115.48, 111.59, 109.25, 107.55, 107.34.

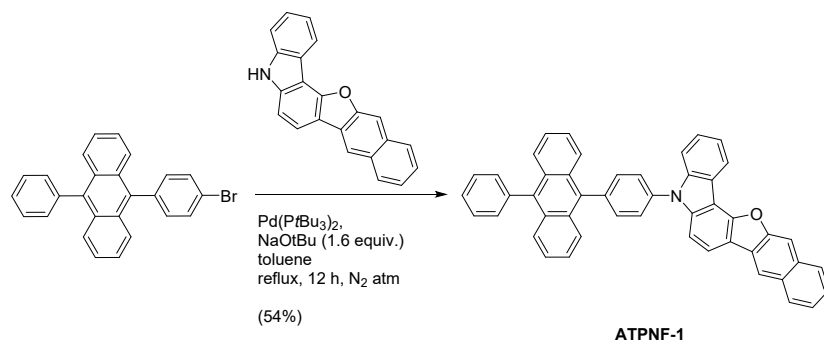

**Scheme S2.** Synthesis of 5-(4-(10-phenylanthracen-9-yl)phenyl)-5H-naphtho[2,3':4,5]furo[3,2-c]carbazole (**ATPNF-1**)

In a 100 mL two neck round-bottomed flask, a mixture of 9-(4-bromophenyl)-10-phenylanthracene (1.00 g, 2.44 mmol), NBFC (0.79 g, 2.56 mmol), and sodium *tert*-butoxide (NaO<sup>t</sup>Bu) (0.47 g, 4.88 mmol) was added in 20 mL of *m*-xylene. The reaction mixture was stirred under a nitrogen atmosphere for 20 min and added 1.0 mol% of (PdP<sup>t</sup>Bu<sub>3</sub>)<sub>2</sub> as a catalyst. The reaction mixture was then stirred at reflux for 8 h. After cooling, the solvent was removed under vacuum and the crude mixture was extracted in chloroform and deionized water. The organic layer was dried over anhydrous Na<sub>2</sub>SO<sub>4</sub>, and filtered through a short silica plug, and the solvent was evaporated under reduced pressure. The resulting product was further purified by toluene recrystallization and obtained as a white solid (0.84 g, 1.32 mmol). <sup>1</sup>H NMR (500 MHz, CDCl<sub>3</sub>) δ 8.69 (d, *J* = 7.6 Hz, 1H), 8.46 (s, 1H), 8.18 – 8.13 (m, 2H), 8.07 (dd, *J* = 12.6, 7.8 Hz, 2H), 7.90 (dd, *J* = 10.3, 8.5 Hz, 4H), 7.80-7.76 (m, 4H), 7.75 (d, *J* = 8.2 Hz, 1H), 7.69 – 7.64 (m, 3H), 7.61-7.57 (m, 2H), 7.57 – 7.49 (m, 5H), 7.48 – 7.45 (m, 2H), 7.42-7.39 (m, 2H). <sup>13</sup>C NMR (125 MHz, CDCl<sub>3</sub>) δ 155.51 (s), 152.94 (s), 142.22 (s), 140.78 (s), 138.94, 138.85, 137.71, 136.94 (s), 135.85, 133.01 (s), 132.09 (s), 131.30 (s), 130.58 (s), 129.96 (s), 128.48 (s), 128.07 (s), 127.90 (s), 127.60 (s), 127.23, 127.21, 126.67 (s), 126.33 (s), 126.05 (s), 125.44 (s), 125.17 (s), 124.32 (s), 122.95 (s), 121.23 (s), 121.02 (s), 118.57 (s), 117.60 (s), 116.07, 110.07 (s), 108.92 (s), 107.16 (s), 105.56 (s). MS (ESI) *m/z*: found 635.2269. Calculated for C<sub>48</sub>H<sub>29</sub>NO: 635.2249.

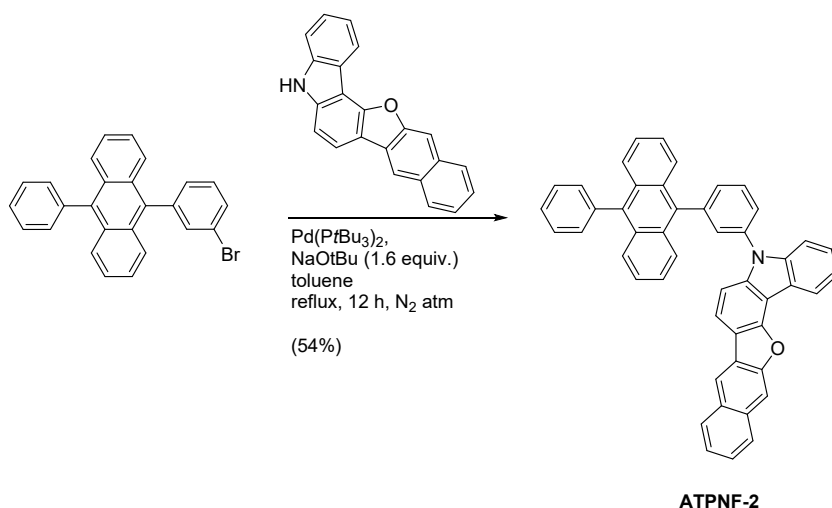

Scheme S3. Synthesis 5-(3-(10-phenylanthracen-9-yl)phenyl)-5*H*-naphtho[2',3':4,5]furo[3,2-*c*]carbazole (**ATPNF-2**)

In a 100 mL two neck round bottomed flask, a mixture of 9-(3-bromophenyl)-10-phenylanthracene (1.00 g, 2.44 mmol), NBFC (0.79 g, 2.56 mmol), and NaO*t*Bu (0.47 g, 4.88 mmol) was added in 20 mL of *m*-xylene. The reaction mixture was stirred under a nitrogen atmosphere for 20 min and added 1.0 mol% of (PdP*t*Bu<sub>3</sub>)<sub>2</sub> as a catalyst. The reaction mixture was then stirred at reflux for 8 h. After cooling, the solvent was removed under vacuum and the crude mixture was extracted in chloroform and deionized water. The organic layer was dried over anhydrous Na<sub>2</sub>SO<sub>4</sub>, and filtered through a short silica plug, and the solvent was evaporated under reduced pressure. The resulting product was further purified by toluene recrystallization and obtained as white solid (0.84 g, 1.32 mmol). <sup>1</sup>H NMR (500 MHz, CDCl<sub>3</sub>) δ 8.64 – 8.58 (m, 1H), 8.39 (s, 1H), 8.11 – 7.99 (m, 4H), 7.95 – 7.85 (m, 4H), 7.82 (t, *J* = 1.7 Hz, 1H), 7.76 (d, *J* = 8.8 Hz, 2H), 7.70 – 7.67 (m, 2H), 7.67 – 7.56 (m, 4H), 7.55 – 7.45 (m, 8H), 7.40 (ddd, *J* = 8.7, 6.5, 1.2 Hz, 2H). <sup>13</sup>C NMR (125 MHz, CDCl<sub>3</sub>) δ 155.43, 152.83, 142.01, 141.26, 140.57, 138.86, 137.84, 137.77, 135.50, 132.04, 131.28, 131.23, 130.75, 130.51, 130.06, 129.94, 129.91, 129.83, 128.47, 128.43, 128.02, 127.85, 127.57, 127.21, 126.49, 126.25, 126.18, 126.00, 125.52, 125.13, 125.10, 124.26, 122.88, 121.19, 120.96, 118.53, 117.52, 116.00, 109.94, 108.87, 107.09, 105.42. MS (ESI) *m/z*: found 635.2269. Calculated for C<sub>48</sub>H<sub>29</sub>NO: 635.2271.

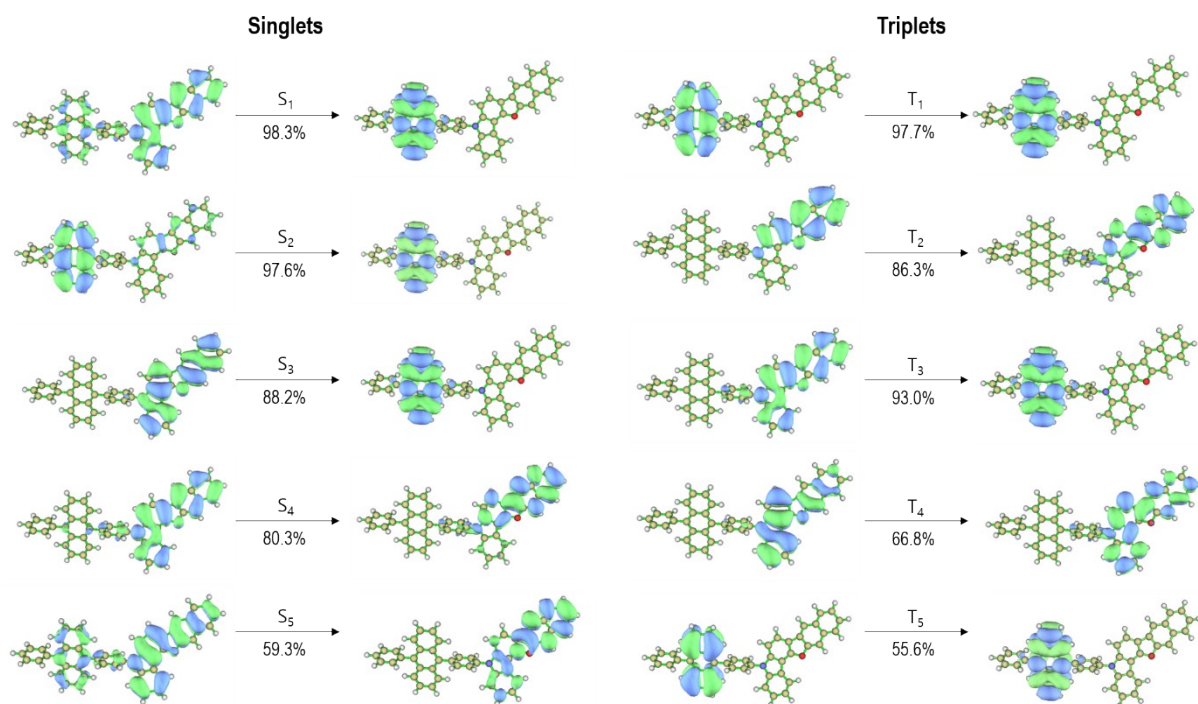

**Figure S1.** The natural transition orbitals of the first five singlet and triplet states of ATPNF-1

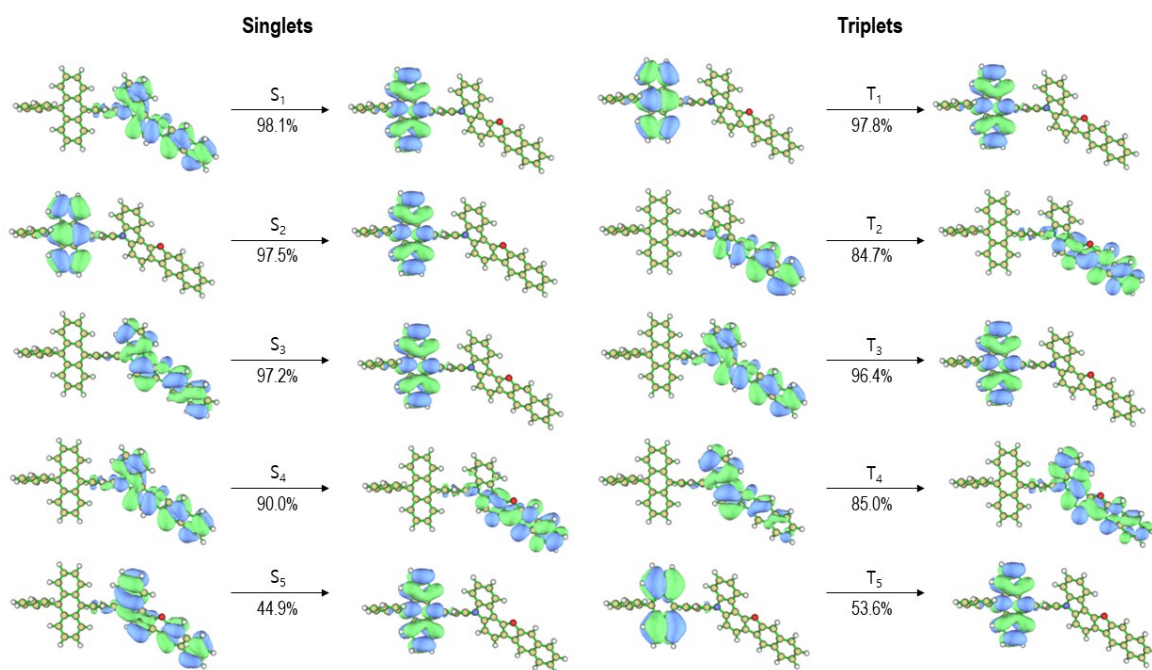

**Figure S2.** The natural transition orbitals of the first five singlet and triplet states of ATPNF-2

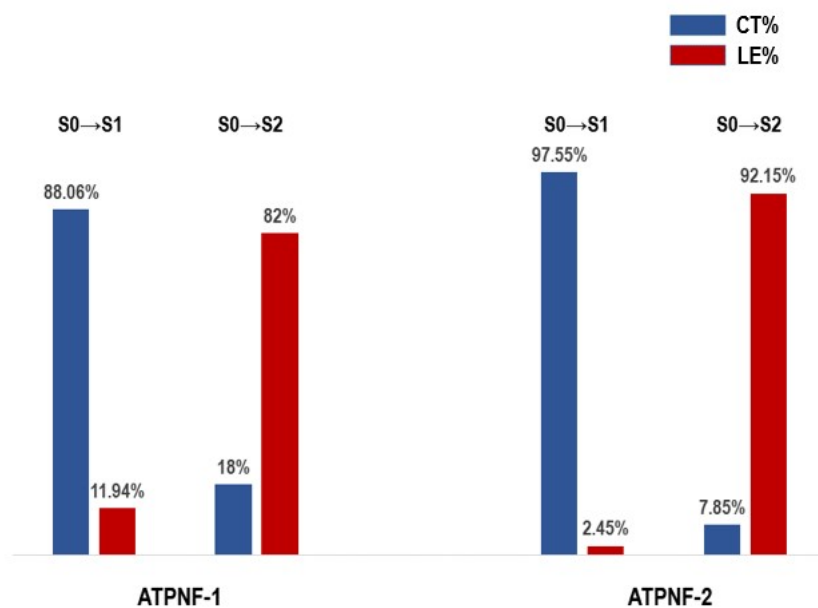

**Figure S3.** The proportions of LE and CT of ATPNF-1 and ATPNF-2 calculated by Multiwfn 3.8(dev)

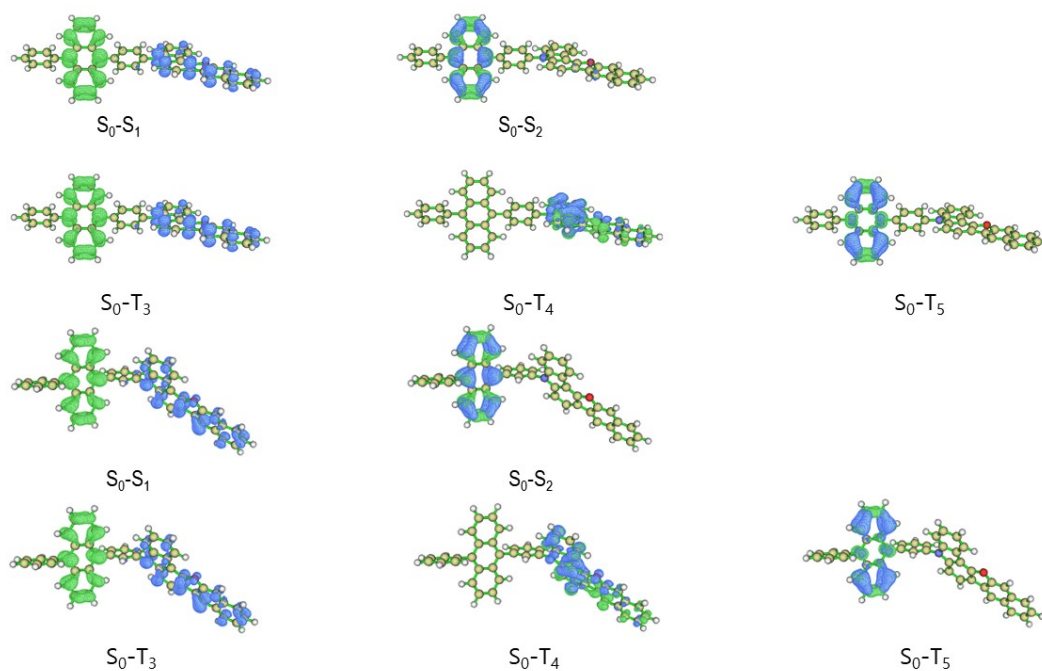

**Figure S4.** Isosurface of the hole (blue) and electron (green) distribution calculated by Multiwfn 3.8(dev) of S<sub>0</sub> to S<sub>1/2</sub> and S<sub>0</sub> to T<sub>3/4/5</sub> for ATPNF-1 and ATPNF-2



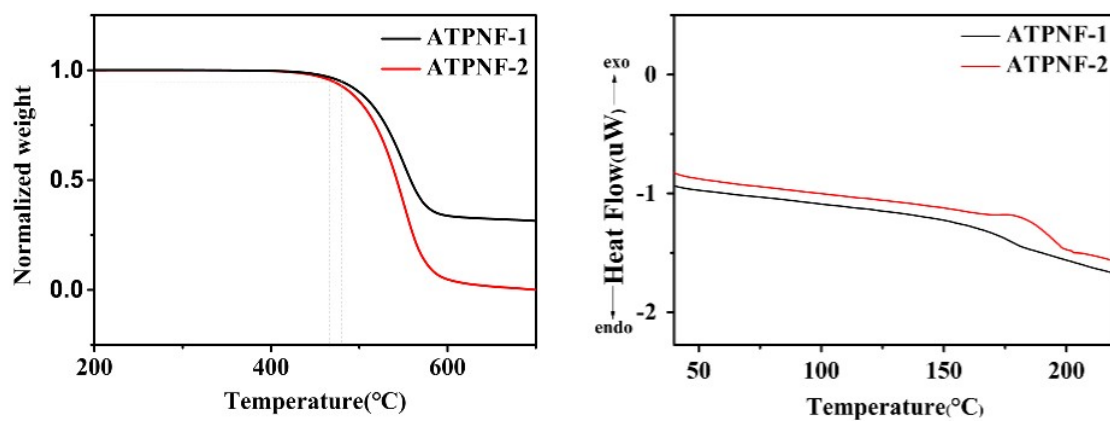

**Figure S5.** TGA and DSC of ATPNF-1 and ATPNF-2

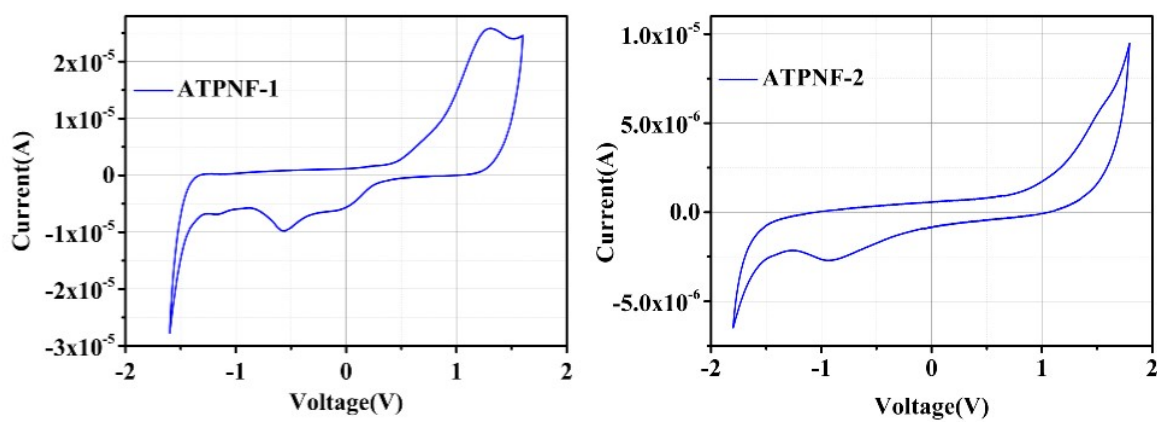

**Figure S6.** The cyclic voltammograms of ATPNF-1 and ATPNF-2 in  $\text{CH}_2\text{Cl}_2$  solution containing 0.1 M TBAP electrolytes, scanning rate: 0.1 V/s

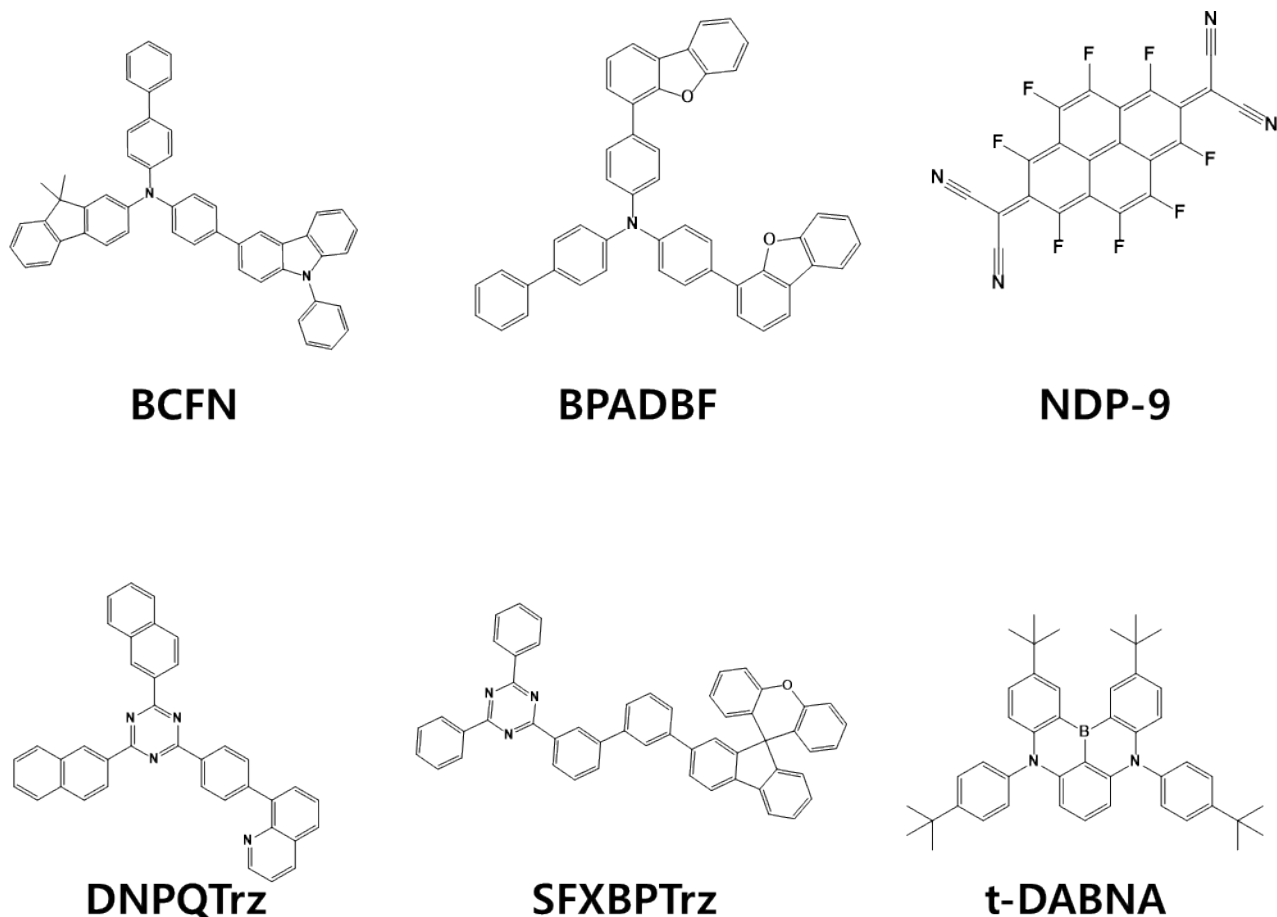

**Figure S7.** Molecular structures. BCFN and NDP-9 were utilized as hole-injecting layer, and BCFN was used as hole-transporting layer either. DNPQTrz was used as electron-transporting layer, BPADBF and SFXBPTTrz as electron-blocking layer and hole-blocking layer. t-DABNA was used as dopant in ATPNF-1-D and ATPNF-2-D

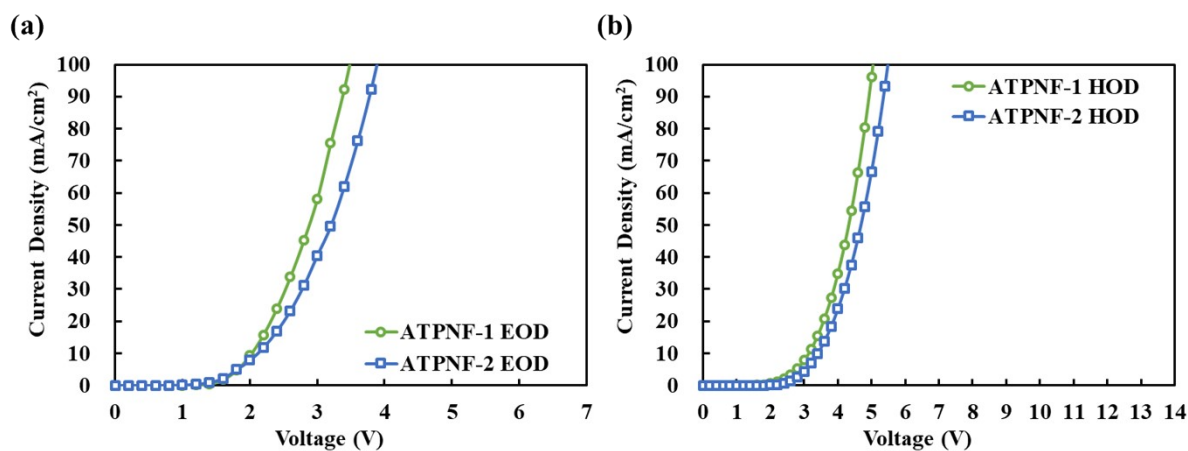

**Figure S8.** *J-V* characteristic of a) electron only device (EOD) b) hole only device (HOD) and

of ATPNF-1-ND and ATPNF-2-ND

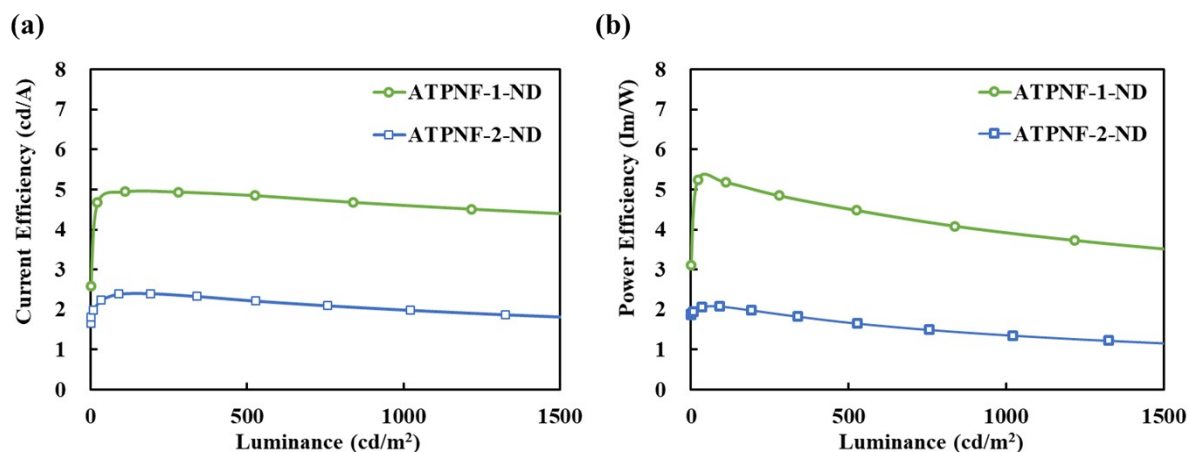

**Figure S9.** CE-luminance-PE curves of ATPNF-1-ND and ATPNF-2-ND

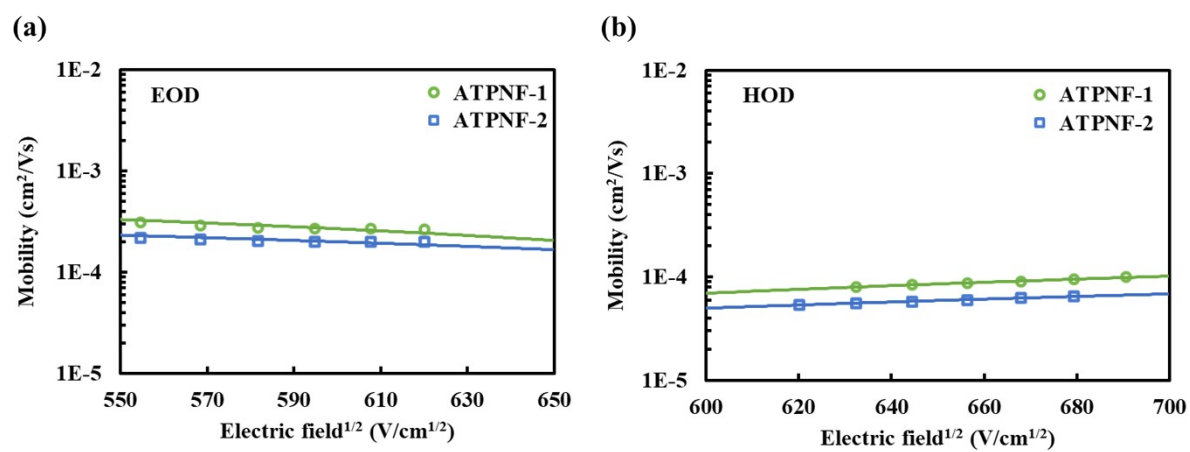

**Figure S10.** Mobility of ATPNF-1-ND and ATPNF-2-ND calculated from SCLC region in a) EOD and b) HOD, respectively

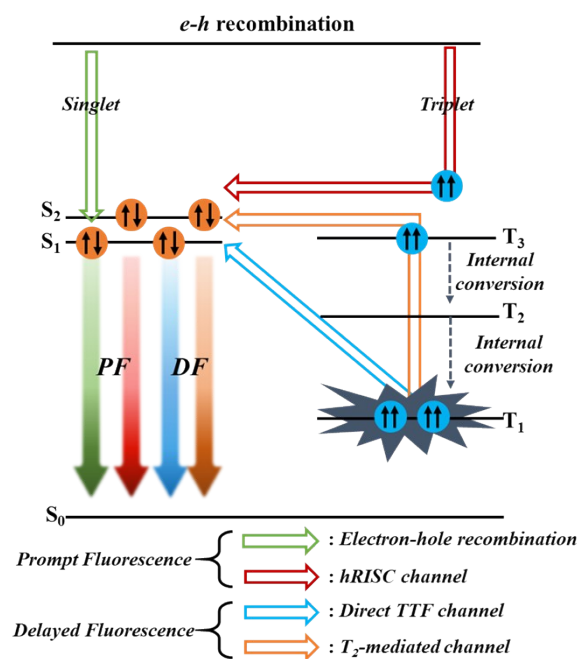

**Figure S11.** Photophysical dynamics of the ATPNF-1-ND and ATPNF-2-ND

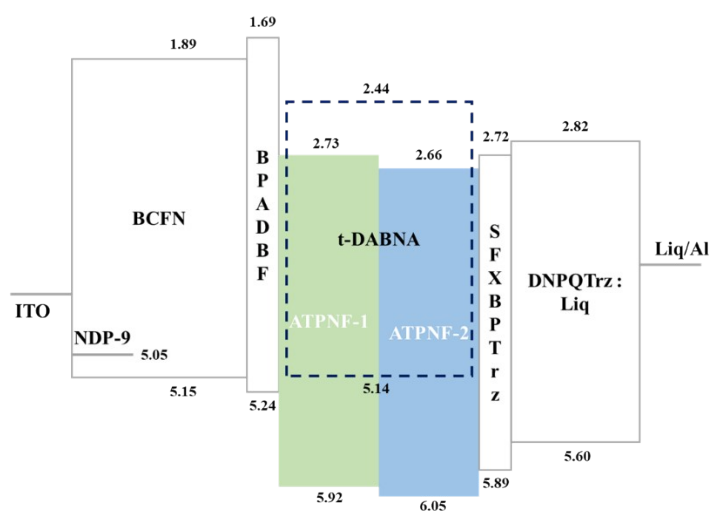

**Figure S12.** Device structure and energy diagram of *t*-DABNA doped ATPNF-1 and ATPNF-2 device (ATPNF-1-D and ATPNF-2-D)

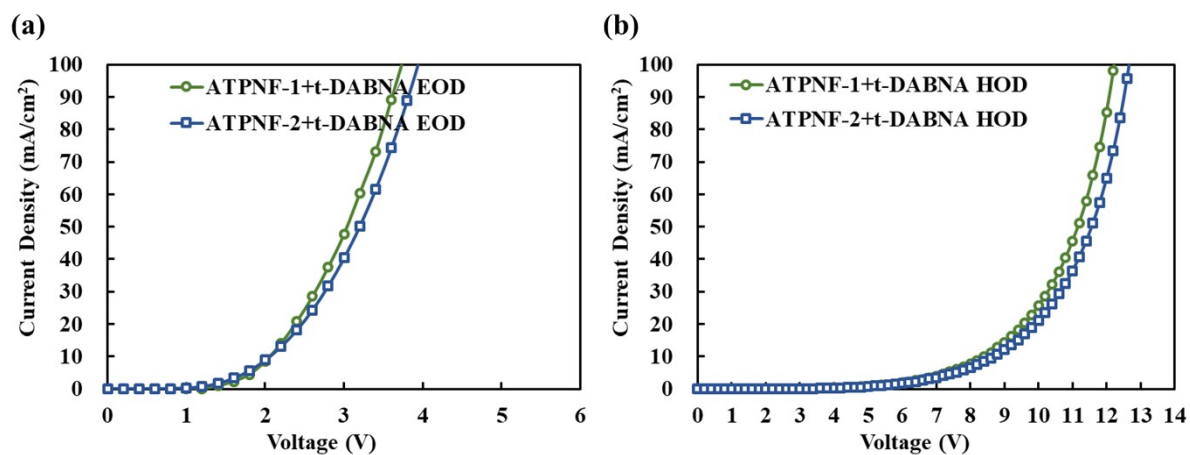

**Figure S13.**  $J$ - $V$  characteristic of a) EOD and b) HOD of ATPNF-1-D and ATPNF-2-D

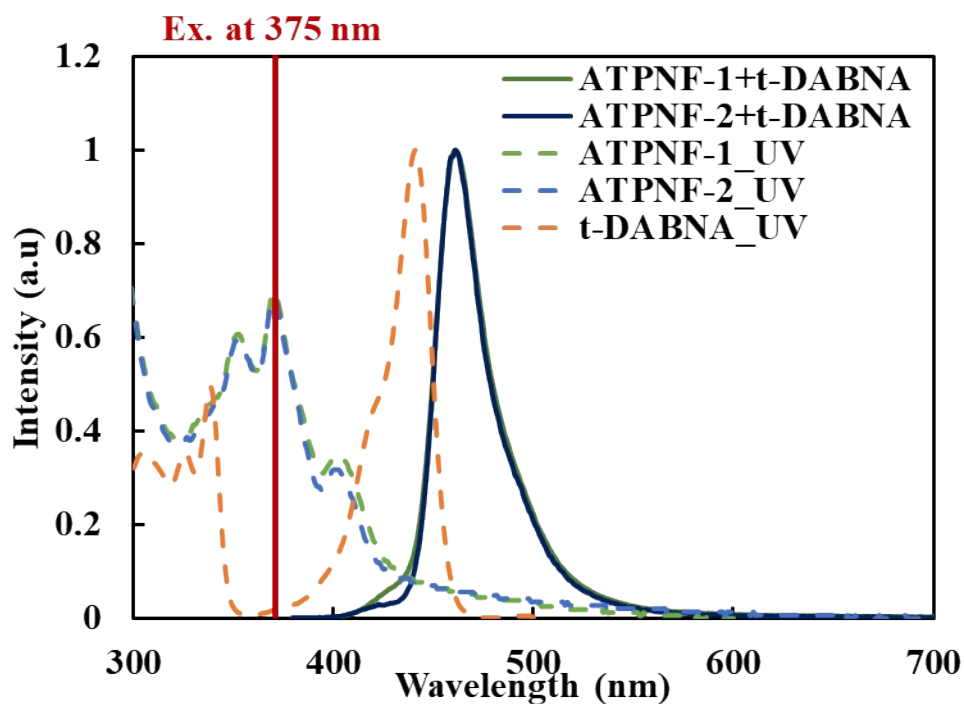

**Figure S14.** Photoluminescence curve of doped ATPNF-1 and ATPNF-2 film excited at 375 nm, and UV-vis of doped ATPNF-1 and ATPNF-2 film and t-DABNA solution (in toluene)

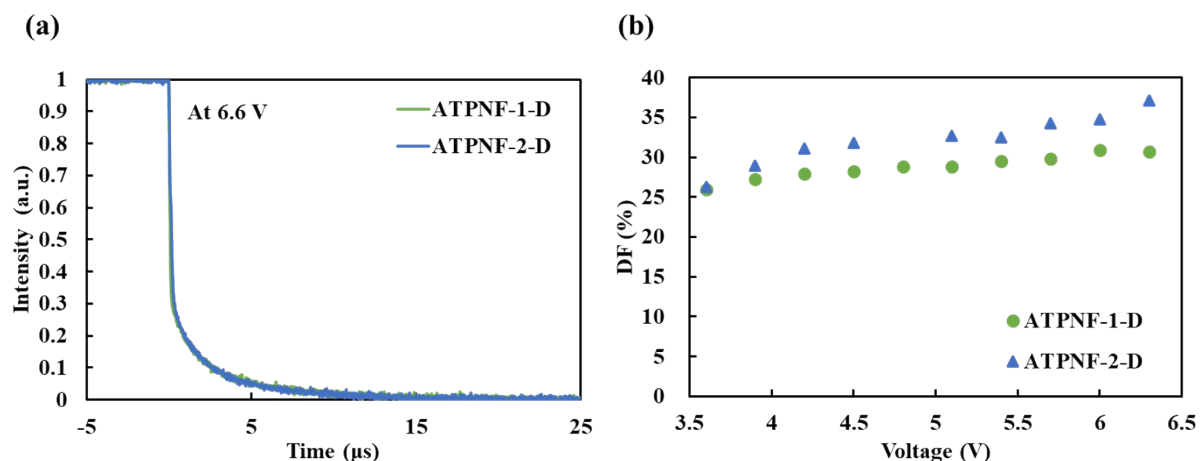

**Figure S15.** a) TrEL response at 6.6 V and b) DF portion of ATPNF-1-D and ATPNF-2-D

| Compound | Excited State | Energy (eV) | $\lambda$ (nm) | Oscillator strength | Wave function (MOs involved in the transitions) |
|----------|---------------|-------------|----------------|---------------------|-------------------------------------------------|
| ATPNF-1  | S1            | 3.07        | 403            | 0.057               | HOMO→LUMO                                       |
|          | S2            | 3.16        | 392            | 0.2017              | HOMO-1→LUMO                                     |
|          | S3            | 3.55        | 348            | 0.0333              | HOMO-2→LUMO, HOMO→LUMO+1                        |
|          | S4            | 3.55        | 348            | 0.3747              | HOMO-2→LUMO, HOMO→LUMO+1                        |
|          | S5            | 3.74        | 330            | 0.0305              | HOMO-2→LUMO+1, HOMO→LUMO+1                      |
| ATPNF-2  | S1            | 3.04        | 406            | 0.0151              | HOMO→LUMO                                       |
|          | S2            | 3.16        | 392            | 0.2109              | HOMO-1→LUMO                                     |
|          | S3            | 3.51        | 352            | 0.0003              | HOMO-2→LUMO                                     |
|          | S4            | 3.55        | 348            | 0.4054              | HOMO→LUMO+1                                     |
|          | S5            | 3.74        | 331            | 0.0139              | HOMO-3→LUMO                                     |

**Table S1.** Calculated electronic excitation energies, oscillator strengths and MO transition contributions for ATPNF-1 and ATPNF-2 using the B3LYP functional with the 6-31G(d,p) basis set

#### ATPNF-1

| Solvents      | $\epsilon$ | $n$   | $f(\epsilon, n)$ | $\lambda_a$ (nm) | $\lambda_f$ (nm) | $\nu_a - \nu_f$ (cm <sup>-1</sup> ) |
|---------------|------------|-------|------------------|------------------|------------------|-------------------------------------|
| Toluene       | 2.38       | 1.494 | 0.014            | 373.8            | 432.0            | 3604                                |
| 1,4-Dioxane   | 2.21       | 1.420 | 0.021            | 373.4            | 432.8            | 3675                                |
| Chloroform    | 4.81       | 1.443 | 0.149            | 373.1            | 433.2            | 3718                                |
| Ethyl acetate | 6.02       | 1.372 | 0.200            | 372.9            | 433.0            | 3722                                |

|                    |      |       |       |       |       |      |
|--------------------|------|-------|-------|-------|-------|------|
| Tetrahydrofuran    | 7.58 | 1.407 | 0.210 | 372.7 | 432.8 | 3725 |
| Dichloromethane    | 8.93 | 1.424 | 0.217 | 372.3 | 433.8 | 3807 |
| Dimethyl formamide | 37   | 1.427 | 0.276 | 371   | 436.2 | 4028 |
| Acetonitrile       | 37.5 | 1.344 | 0.305 | 371   | 436.8 | 4060 |

### ATPNF-2

| Solvents           | $\varepsilon$ | $n$   | $f(\varepsilon, n)$ | $\lambda_a$<br>(nm) | $\lambda_f$<br>(nm) | $\nu_a - \nu_f$<br>(cm <sup>-1</sup> ) |
|--------------------|---------------|-------|---------------------|---------------------|---------------------|----------------------------------------|
| Toluene            | 2.38          | 1.494 | 0.014               | 374.2               | 431.6               | 3556                                   |
| 1,4-Dioxane        | 2.21          | 1.420 | 0.021               | 373.7               | 432.2               | 3621                                   |
| Chloroform         | 4.81          | 1.443 | 0.149               | 373.3               | 433.4               | 3665                                   |
| Ethyl acetate      | 6.02          | 1.372 | 0.200               | 372.8               | 432.4               | 3695                                   |
| Tetrahydrofuran    | 7.58          | 1.407 | 0.210               | 372.8               | 432.2               | 3698                                   |
| Dichloromethane    | 8.93          | 1.424 | 0.217               | 372.7               | 434.4               | 3809                                   |
| Dimethyl formamide | 37            | 1.427 | 0.276               | 373.1               | 435.2               | 3824                                   |
| Acetonitrile       | 37.5          | 1.344 | 0.305               | 370.8               | 435.6               | 4011                                   |

**Table S2.** Detailed absorption and emission peak positions of ATPNF-1 and ATPNF-2 in different solvents.

| Device  | $\gamma_{e-h}$ | $\Phi_{PL}$<br>(%) | $\eta_{out}$<br>(%) | EUE<br>(%) | $f_{DF}$<br>(%) | $\eta_{PF}$<br>(%) | $\eta_{DF}$<br>(%) | $\eta_s$<br>(%) | $\eta_{hRISC}$<br>(%) | $\eta_{TTF-hRISC}$<br>(%) | $\eta_{TTF}$<br>(%) |
|---------|----------------|--------------------|---------------------|------------|-----------------|--------------------|--------------------|-----------------|-----------------------|---------------------------|---------------------|
| ATPNF-1 | 1              | 54.6               | 20.0                | 63.6       | 28.1            | 45.8               | 17.9               | 25              | 20.8                  | 13.4                      | 4.5                 |
| ATPNF-2 | 1              | 42.0               | 20.0                | 47.7       | 31.9            | 32.5               | 15.2               | 25              | 7.5                   | 11.4                      | 3.8                 |

**Table S3.** The subdivided proportions that contribute to radiative singlet exciton efficiency of ATPNF-1-ND and ATPNF-2-ND

| Device  | $V_{op}^a$<br>(V) | EQE <sub>max</sub><br>(%) | CE <sub>max</sub><br>(cd/A) | PE <sub>max</sub><br>(lm/W) | $\lambda_{max}$<br>(nm) | FWHM<br>(nm) | CIE <sub>xy</sub> <sup>b</sup> | Roll-off <sup>c</sup><br>(%) |
|---------|-------------------|---------------------------|-----------------------------|-----------------------------|-------------------------|--------------|--------------------------------|------------------------------|
| ATPNF-1 |                   | 8.0                       | 6.7                         | 7.0                         | 463                     | 31           | 0.13, 0.10                     | 0.49                         |
| ATPNF-2 |                   | 7.8                       | 6.1                         | 5.1                         | 462                     | 30           | 0.13, 0.09                     | 0.25                         |

a) Operational voltage at 1 mA/m<sup>2</sup>, b) At luminance 1000 cd/m<sup>2</sup>, and c) 1-(EQE at 1000 cd/m<sup>2</sup> / EQE<sub>max</sub>)

**Table S4.** The EL properties of ATPNF-1-D and ATPNF-2-D

| Compound         | Von        | EQEmax/<br>@1000 cd/m <sup>2</sup><br>(Roll-off (%)) | ELmax      | CIE(x,y)            | Reference                                                          |
|------------------|------------|------------------------------------------------------|------------|---------------------|--------------------------------------------------------------------|
| <b>This Work</b> | <b>2.9</b> | <b>7.0/6.67 (4.8)</b>                                | <b>446</b> | <b>(0.15, 0.07)</b> |                                                                    |
| PTPC             | 3.1        | 6.78/6.18 (8.9)                                      | 411        | (0.157, 0.059)      | <i>Mater. Chem. Front.</i> <b>2022</b> , <i>6</i> , 2085           |
| P2MPC            | 3.1        | 7.15/5.65 (21.0)                                     | -          | (0.157, 0.064)      | <i>J. Mater. Chem. C.</i> <b>2022</b> , <i>10</i> , 9621           |
| ATDBF            | 2.6        | 7.93/7.23 (8.8)                                      | 439        | (0.15, 0.06)        | <i>Adv. Opt. Mater.</i> <b>2022</b> , <i>10</i> , 2200256          |
| 3-CzPOPPI        | 2.9        | 5.08/4.44 (12.6)                                     | 436        | (0.156, 0.061)      | <i>J. Mater. Chem. C.</i> <b>2018</b> , <i>6</i> , 3584            |
| CSiTPI           | 3.2        | 7.1/5.3 (25.4)                                       | 404        | (0.16, 0.06)        | <i>Adv. Opt. Mater.</i> <b>2021</b> , <i>9</i> , 2100965           |
| PCZTZ            | 3.2        | 6.57/-                                               | -          | (0.17, 0.07)        | <i>Adv. Opt. Mater.</i> <b>2017</b> , <i>5</i> , 1700747           |
| CSiTPI           | 3.2        | 7.10/5.30 (25.4)                                     | 404        | (0.160, 0.06)       | <i>Adv. Opt. Mater.</i> <b>2021</b> , <i>9</i> , 2100965           |
| C2MPI            | 3.9        | 6.97/-                                               | 404        | (0.161, 0.06)       | <i>J. Mater. Chem. C.</i> <b>2023</b> , <i>11</i> , 1733           |
| PTPC             | 3.1        | 6.78/6.18 (8.2)                                      | 411        | (0.157, 0.06)       | <i>Mater. Chem. Front.</i> <b>2022</b> , <i>6</i> , 2085           |
| 2FPIDPA          | 2.8        | 6.73/4.01 (40.4)                                     | 420        | (0.156, 0.055)      | <i>Org. Mater.</i> <b>2020</b> , <i>02</i> , 011                   |
| TPBCzC2          | 3.4        | 4.78/-                                               | 423        | (0.159, 0.06)       | <i>ACS Appl. Mater. Interfaces</i> <b>2020</b> , <i>12</i> , 46366 |
| TFPBI            | 3.0        | 5.74/4.80 (16.4)                                     | 448        | (0.152, 0.054)      | <i>J. Mater. Chem. C.</i> <b>2019</b> , <i>7</i> , 592             |
| PPi-Mid          | 3.1        | 4.60/4.08 (11.3)                                     | 436        | (0.154, 0.058)      | <i>ACS Appl. Mater. Interfaces</i> <b>2018</b> , <i>10</i> , 9629  |
| 4-PPI-SBF        | 2.75       | 5.29/-                                               | 424        | (0.155, 0.058)      | <i>Dyes Pigm.</i> <b>2019</b> , <i>163</i> , 213                   |
| SAFpCN           | 3.2        | 4.63/3.31 (28.5)                                     | 432        | (0.153, 0.054)      | <i>J. Mater. Chem. C.</i> <b>2021</b> , <i>9</i> , 6251            |
| TPIN             | 3.0        | 3.71/3.70 (0.0)                                      | 443        | (0.151, 0.08)       | <i>Dyes Pigm.</i> <b>2022</b> , <i>200</i> , 110135                |
| MBAn-(4)-F       | 3.6        | 6.11/1.30 (78.7)                                     | 440        | (0.155, 0.058)      | <i>Dyes Pigm.</i> <b>2018</b> , <i>148</i> , 329                   |
| m-BBTPI          | 3.2        | 3.63/3.36 (7.4)                                      | 428        | (0.160, 0.06)       | <i>RSC Adv.</i> <b>2015</b> , <i>5</i> , 18067                     |
| PhImPOtBuCz      | 4.4        | 3.42/-                                               | 419        | (0.150, 0.06)       | <i>Chem. Eng. J.</i> <b>2022</b> , <i>429</i> , 132327             |
| TPINCz           | 3.1        | 5.95/-                                               | 448        | (0.157, 0.084)      | <i>Chem. Sci.</i> <b>2017</b> , <i>8</i> , 3599                    |
| p-PO15NCzDPA     | 2.8        | 6.40/5.58 (12.8)                                     | 444        | (0.151, 0.066)      | <i>Chem. Eng. J.</i> <b>2020</b> , <i>393</i> , 124694             |
| 2PPIAn           | 3.0        | 8.9/-                                                | 444        | (0.150, 0.060)      | <i>ACS Appl. Mater. Interfaces</i> <b>2020</b> , <i>12</i> , 15422 |
| SP               | 3.0        | 11.3/7.0 (38.1)                                      | 436        | (0.158, 0.07)       | <i>Chem. Eng. J.</i> <b>2022</b> , <i>440</i> , 135911             |

**Table S5.** The non-doped deep blue devices with CIE<sub>y</sub> ≤ 0.07 reported and present work

### Equation S1.

$$\eta_{PF} = EUE - \eta_{DF} \quad (1)$$

$$f_{DF} = \frac{\eta_{DF}}{\eta_{PF} + \eta_{DF}} \quad (2)$$

$$\eta_{hRISC} = \eta_{PF} - \eta_s \quad (3)$$



$$\eta_{DF} = \eta_{TTF-hRISC} + \eta_{TTF} \quad (4)$$

$$\frac{\eta_{TTF-hRISC}}{\eta_{TTF}} = \frac{3k_{m-hRISC}}{k_{IC}^{Tn} + k_{m-hRISC}} \quad (If. k_{IC}^{Tn} \ll k_{m-hRISC}) \quad (5)$$

## II. Measurements

### *Photophysical, thermal and electrochemical property measurements*

All reactions were performed under a nitrogen atmosphere unless otherwise noted. Reactions were monitored by thin layer chromatography (TLC) using Kieselgel 60 F254 silica gel plates. Flash chromatography was performed over silica gel 60, 230-400 mesh, with the designated solvents. The relative abundance of the isomers was determined using a 500 MHz nuclear magnetic resonance spectrometer (NMR; JNM-ECZ500R, Jeol Ltd., Tokyo, Japan) serviced by the Center for Bionano Materials Research at Gachon University (Seongnam, Korea). UV-vis absorption spectra were recorded on a UV-1900 spectrometer (Shimadzu). PL spectra were recorded on a Hitachi F-7100 fluorescence spectrophotometer. Differential scanning calorimetry (DSC) was performed on a TA DSC Q2000 at a heating rate of 10 °C min<sup>-1</sup> under nitrogen. HPLC analysis was performed using a Waters Alliance 2695 series HPLC and a UV-vis detector. Thermogravimetric analysis (TGA) was performed on a TA SDT 650 instrument at a heating rate of 10 °C min<sup>-1</sup> under nitrogen. The temperature at 5% weight loss was used as the decomposition temperature (T<sub>d</sub>). Cyclic voltammetry (CV) was carried out on a WPG100e (WonATech) at room temperature with ferrocenium-ferrocene (Fc<sup>+</sup>/Fc) as the internal standard. The oxidative scans were performed using 0.1 M n-Bu<sub>4</sub>NPF<sub>6</sub> (TBAPF<sub>6</sub>) in deoxygenated dichloromethane as the supporting electrolyte. The cyclic voltammograms were

obtained at a scan rate of 0.1 V s<sup>-1</sup>.

### ***Lippert-Mataga analysis***

The energy difference of the fluorescence maximum relative to the absorption maximum as a function of the solvent orientation parameter  $f(\epsilon, n)$  has been used as a measure of the change in dipole moment between the excited state and the ground state. Based on the Lippert-Mataga equation, the difference between the dipole moment of the excited and ground state ( $\mu_e - \mu_g$ ) can be estimated from the slope of a plot of  $\nu_a - \nu_f$  versus  $f(\epsilon, n)$ :

$$hc(\nu_a - \nu_f) = hc(\nu_a^o - \nu_f^o) + \frac{2(\mu_e - \mu_g)^2}{a_o^3} f(\epsilon, n) \quad \text{or}$$

$$\mu_e = \mu_g + \left\{ \frac{hca_o^3}{2} \cdot \left[ \frac{d(\nu_a - \nu_f)}{df(\epsilon, n)} \right] \right\}^{1/2}$$

where  $\mu_e$  is the dipole moment of the excited state,  $\mu_g$  is the dipole moment of the ground state,  $h$  is Planck's constant,  $c$  is the speed of light,  $a_o$  is the radius of the Onsager cavity and  $\nu_a - \nu_f$  is the Stokes shift.  $f(\epsilon, n)$  is the orientational polarizability of the solvent, defined as follows:

$$f(\epsilon, n) = \frac{\epsilon - 1}{2\epsilon + 1} - \frac{n^2 - 1}{2n^2 + 1}$$

where  $\epsilon$  and  $n$  are the dielectric constant and the refractive index of the solvent, respectively.

The  $\mu_e$  value are estimated to be 8.3D in low-polarity solvents and 16.1D in high-polarity solvents for ATPNF-1. Similarly, the  $\mu_e$  values ATPNF-2 are calculated to be 9.1D and 15.4D

### III. $^1\text{H}$ NMR of ATPNF-1 and ATPNF-2 in $\text{CDCl}_3$

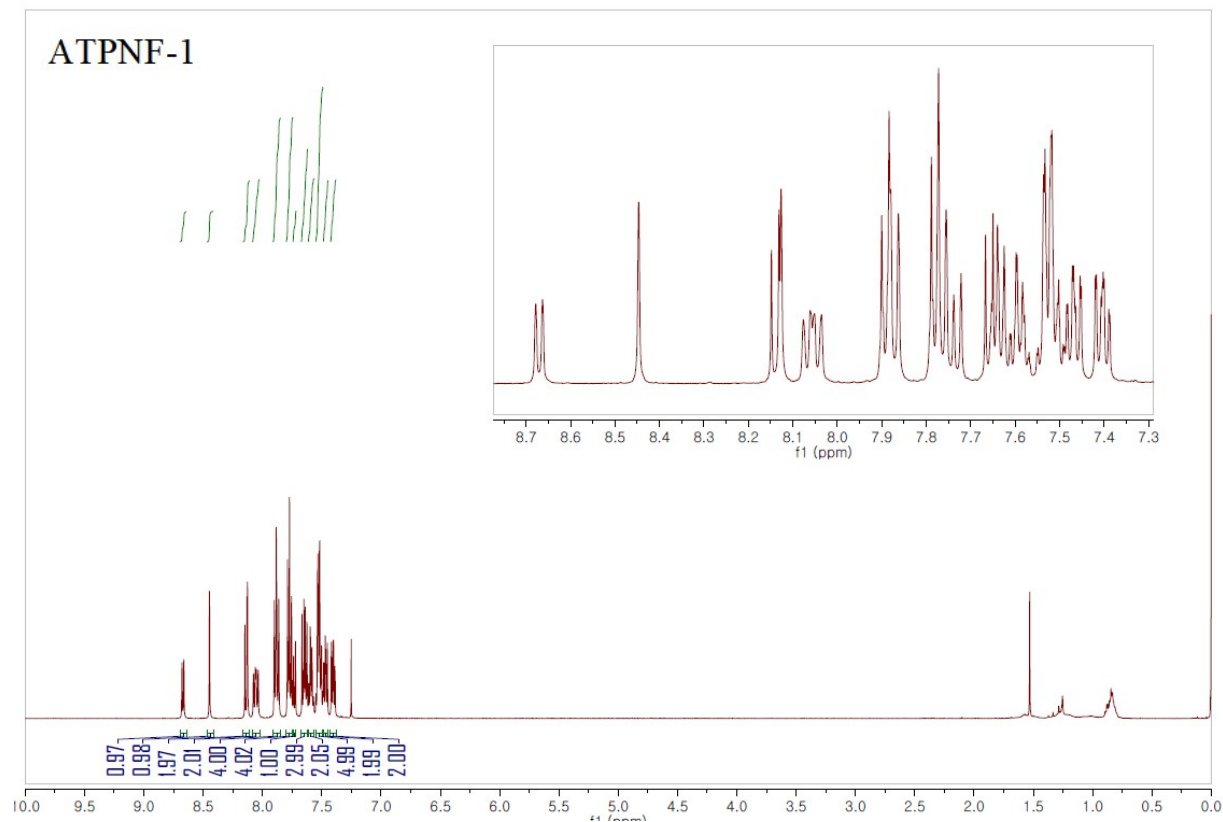

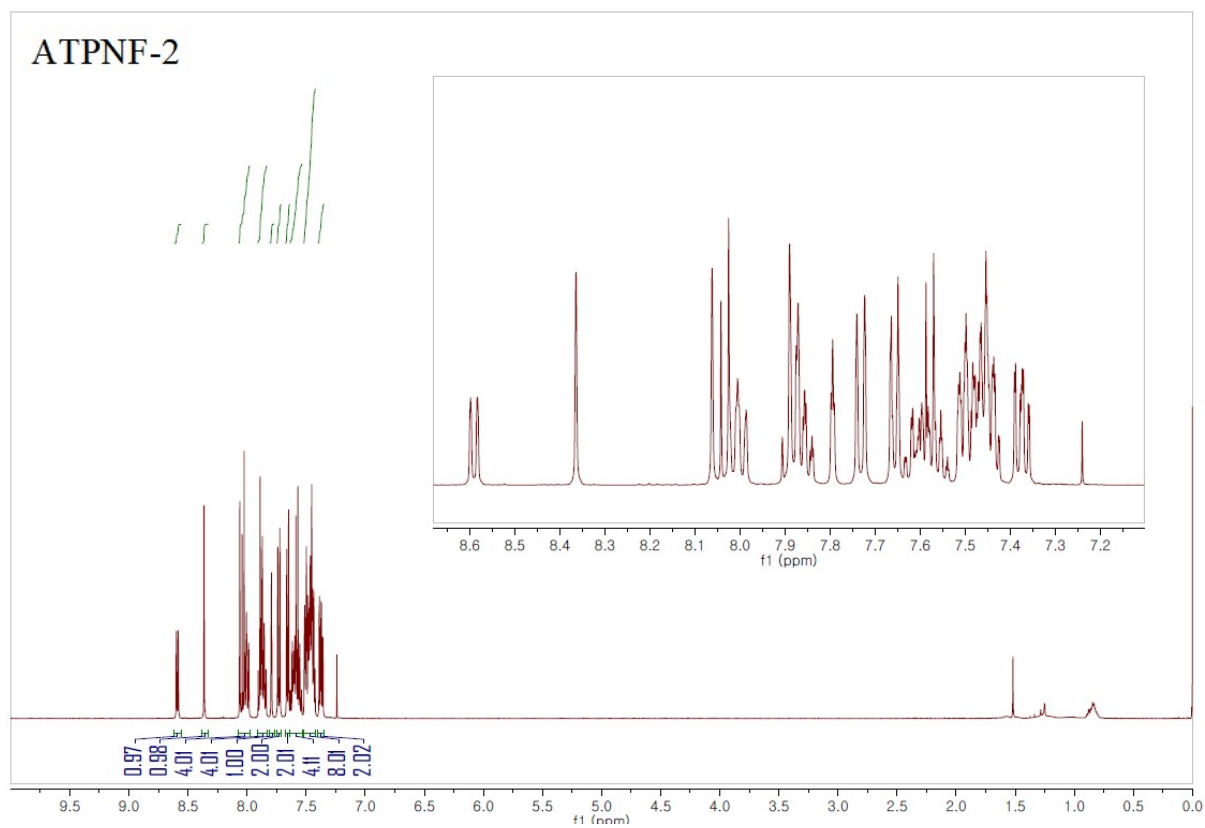

IV.  $^{13}\text{C}$  NMR of ATPNF-1 and ATPNF-2 in  $\text{CDCl}_3$

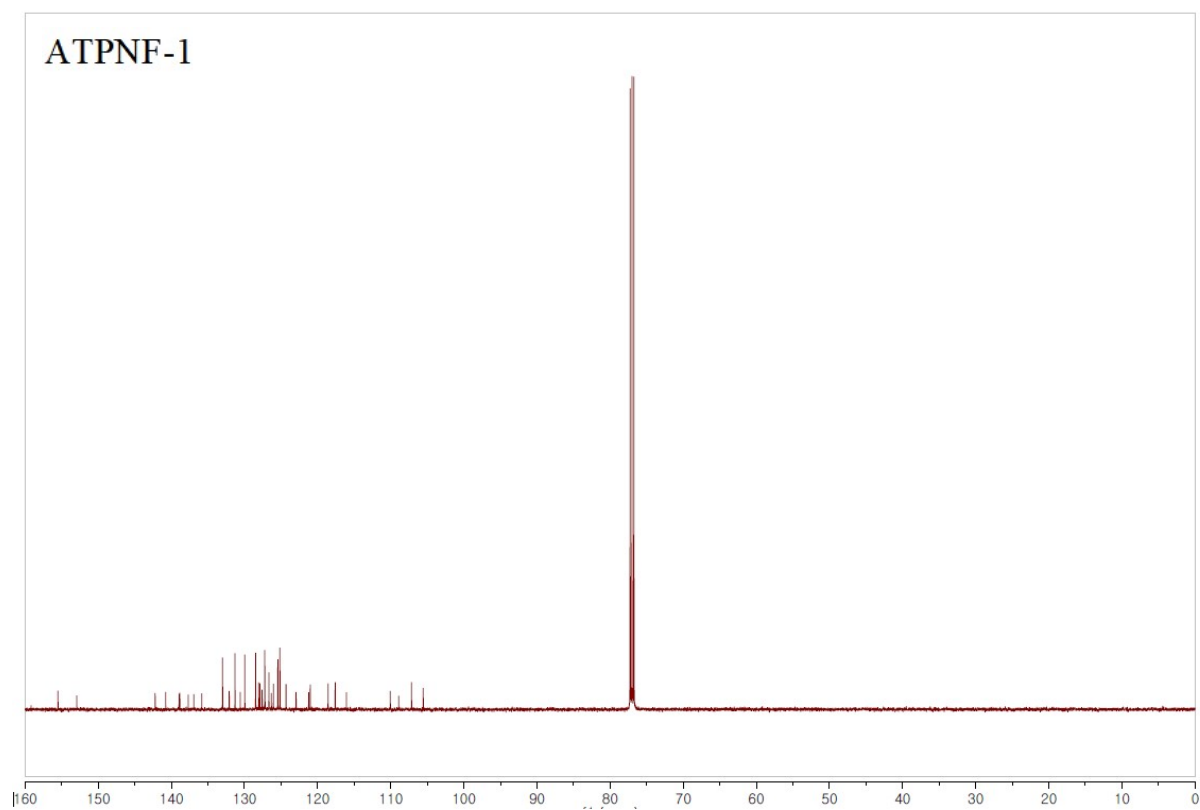

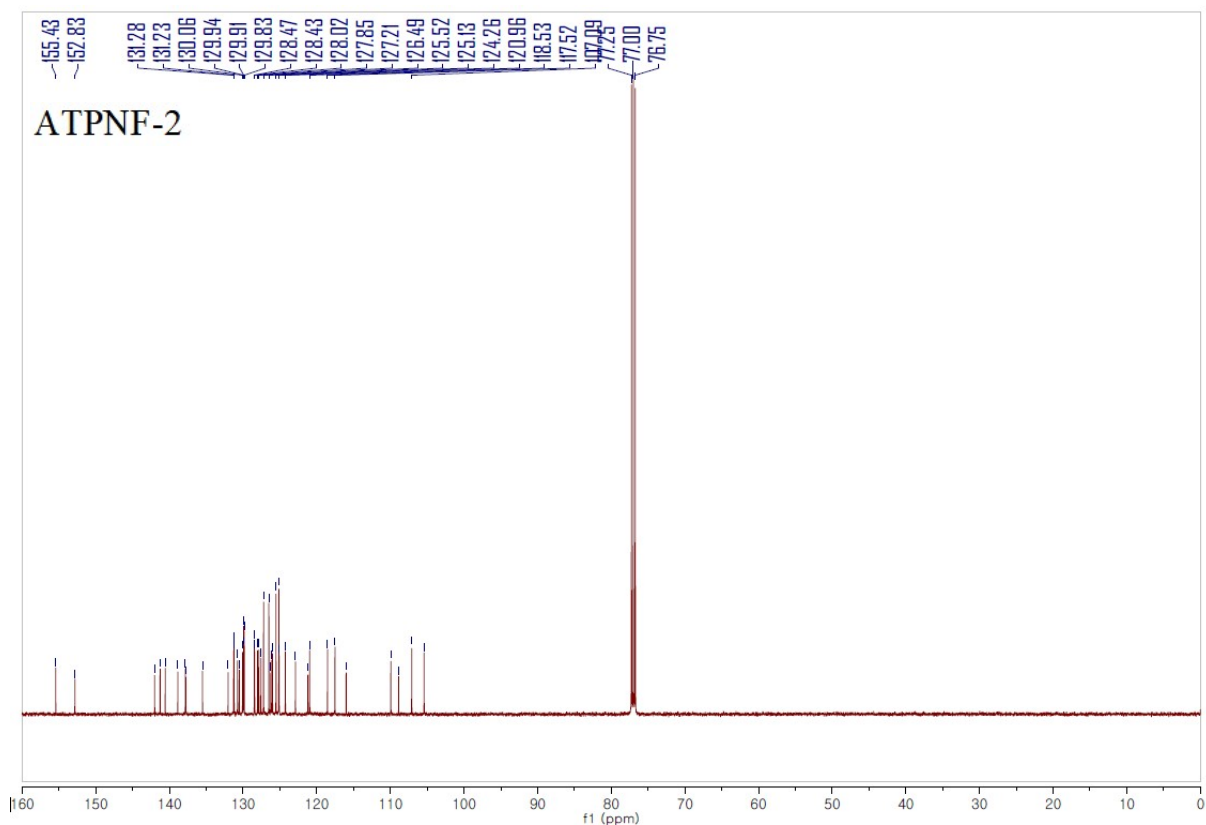

## V. HR-MS of ATPNF-1 and ATPNF-2

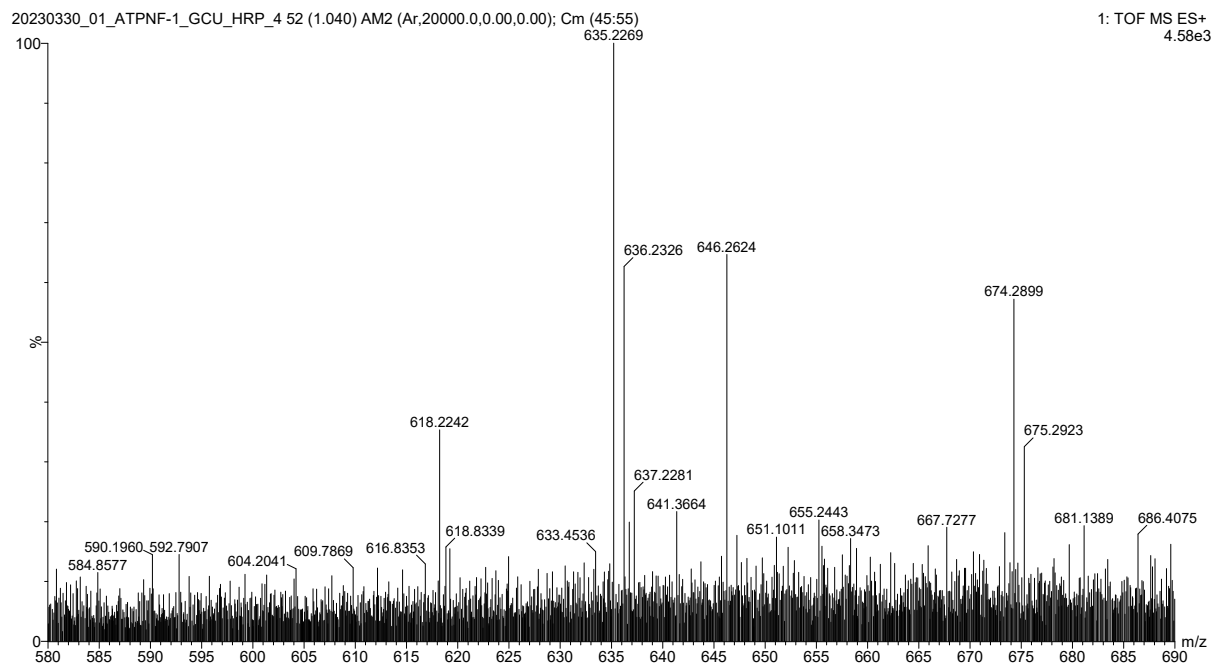

## Elemental Composition Report

Single Mass Analysis

Tolerance = 5.0 PPM / DBE: min = -9.0, max = 100.0

S21

Element prediction: Off

Number of isotope peaks used for i-FIT = 3

Monoisotopic Mass, Odd and Even Electron Ions

78 formula(e) evaluated with 1 results within limits (up to 50 closest results for each mass)

Elements Used:

C: 0-50    H: 0-130    N: 0-2    O: 0-2

Minimum: -9.0

Maximum: 5.0    5.0    100.0

| Mass        | Calc. Mass | mDa        | PPM  | DBE   | i-FIT      |
|-------------|------------|------------|------|-------|------------|
| Norm        | Conf(%)    | Formula    |      |       |            |
| 635.2269    | 635.2249   | 2.0    3.1 | 35.0 | 332.2 | n/a    n/a |
| C48 H29 N O |            |            |      |       |            |

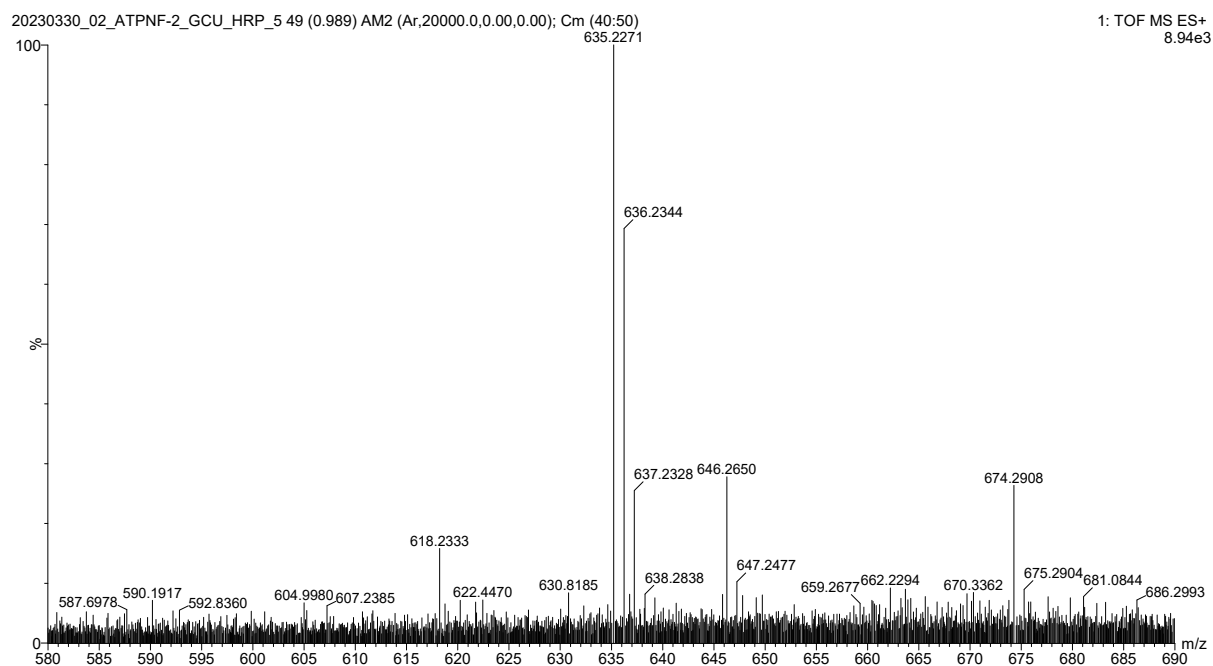

## Elemental Composition Report

Single Mass Analysis

Tolerance = 5.0 PPM    /    DBE: min = -9.0, max = 100.0

Element prediction: Off

Number of isotope peaks used for i-FIT = 3

Monoisotopic Mass, Odd and Even Electron Ions

78 formula(e) evaluated with 1 results within limits (up to 50 closest results for each mass)

Elements Used:

C: 0-50 H: 0-130 N: 0-2 O: 0-2

Minimum: -9.0

Maximum: 5.0 5.0 100.0

| Mass        | Calc. Mass | mDa | PPM | DBE  | i-FIT |
|-------------|------------|-----|-----|------|-------|
| 635.2271    | 635.2249   | 2.2 | 3.5 | 35.0 | 298.7 |
| C48 H29 N O |            |     |     |      |       |

## VI. HPLC of ATPNF-1 and ATPNF-2

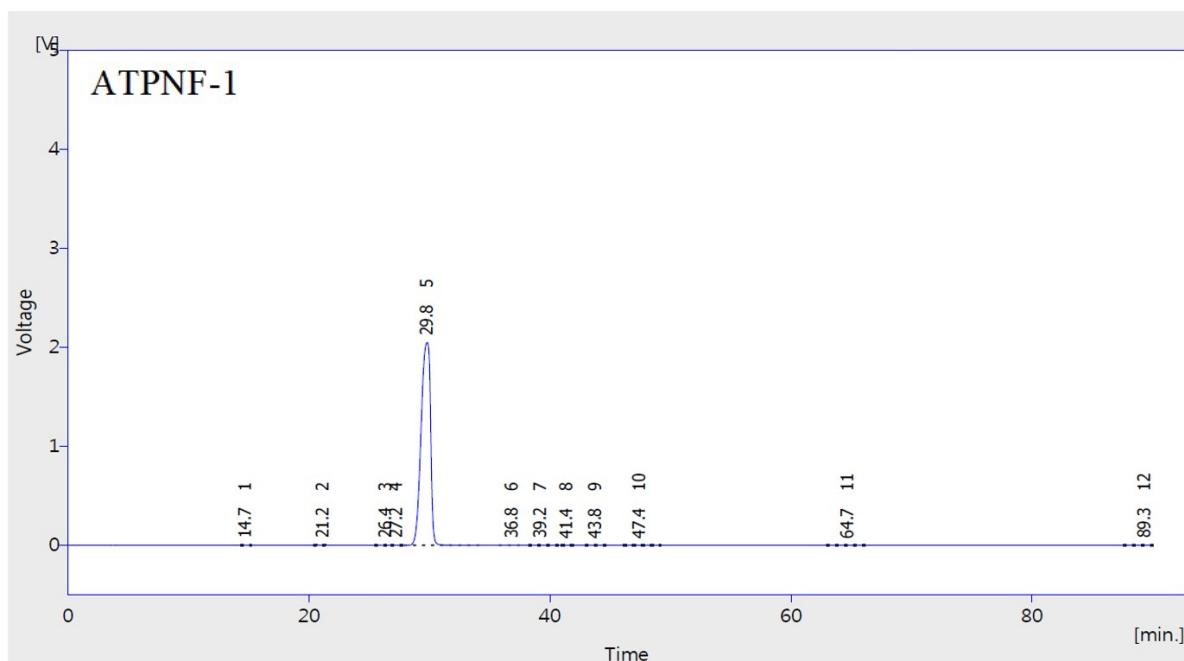

Column : Shiseido MG C18 4.6\* 150mm, 5 um\_Method : ACN\_MeOH 7\_3 0.5ml\_90min

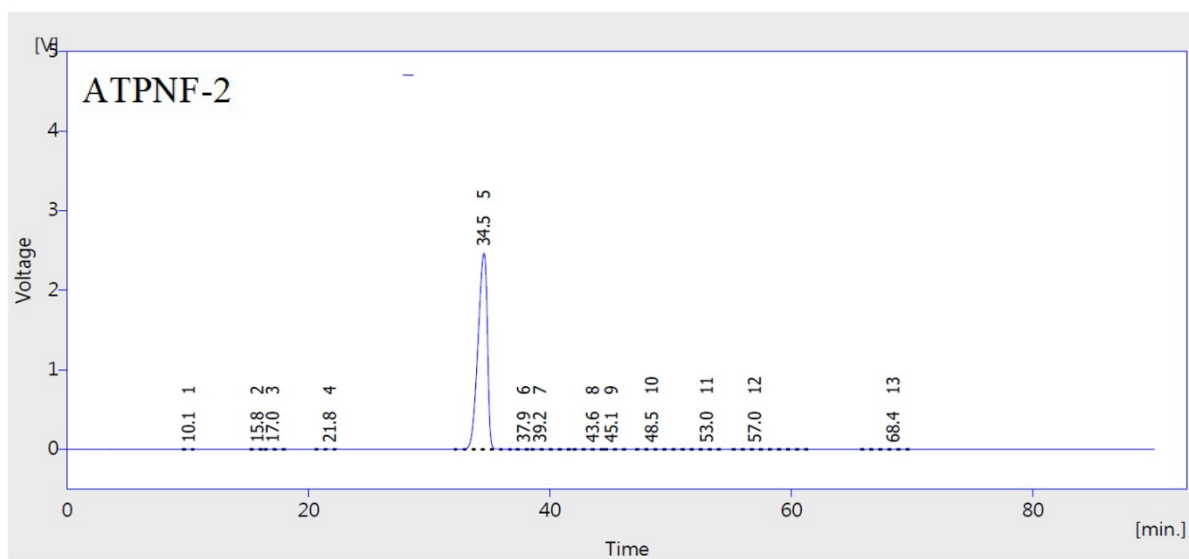

Column : Shiseido MG C18 4.6\* 150m m, 5 um\_Method : ACN\_MeOH 7\_3 0.5ml\_90min
